# Supplementary material for: NLRC5 Deficiency Reduces LPS-Induced Microglial Activation via Inhibition of NF-κB Signaling and Ameliorates Mice’s Depressive-like Behavior
Source: MDPI journal article supplement (doi:10.3390/ijms241713265), 2023-08-26
Supplement: s1 [file s1]

**Supplementary Table S1. The information of PCR primers.**

| List of oligonucleotide sequences  | 5'-3'                    |
|------------------------------------|--------------------------|
| <i>Tnf-<math>\alpha</math></i> -F  | AGTCCGGGCAGGTCTACTTT     |
| <i>Tnf-<math>\alpha</math></i> -R  | ACCCTGAGCCATAATCCCCT     |
| <i>Il-1b</i> -F                    | ATGCCACCTTTTGACAGTGATG   |
| <i>Il-1b</i> -R                    | GCAGCCCTTCATCTTTTGGG     |
| <i>Il-6</i> -F                     | TCTATACCACTTCACAAGTCGGA  |
| <i>Il-6</i> -R                     | GAATTGCCATTGCACAACCTCTTT |
| <i><math>\beta</math>-actin</i> -F | GTGACGTTGACATCCGTAAAGA   |
| <i><math>\beta</math>-actin</i> -R | GCCGGACTCATCGTACTCC      |
| <i>Nlrc5</i> -F                    | TCAGCCCAGAACAAGTATCC     |
| <i>Nlrc5</i> -R                    | TGGGCACAGACTTCCATTAG     |
